# Supplementary material
Source: PubMed Central journal article supplement (PMC3676664)
Supplement: Supp_Fig1.pdf [file Supp_Fig1.pdf]

## Supplementary Data

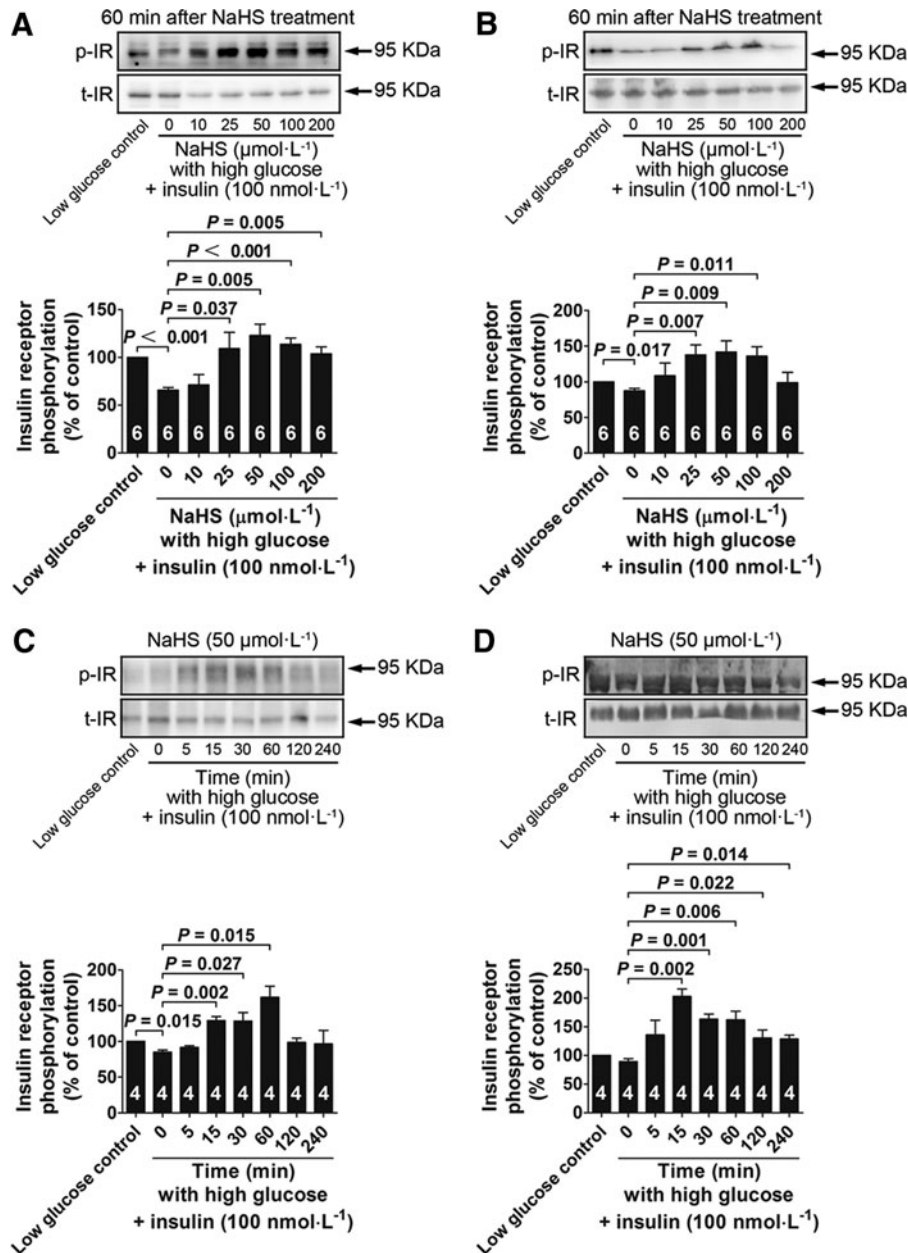

**SUPPLEMENTARY FIG. S1.** NaHS treatment increases phosphorylation of the IR in L6 myotubes and 3T3-L1 adipocytes in the presence of high glucose (25 mM) and insulin (100 nM). (A, B) Dose-response of NaHS treatment (10–200  $\mu\text{M}$ ) for 60 min on phosphorylation of the IR in L6 myotubes and 3T3-L1 adipocytes exposed to a high-glucose medium (25 mM) with insulin (100 nM). (C, D) Time course of phosphorylation of the IR induced by NaHS treatment (50  $\mu\text{M}$ ) in L6 myotubes and 3T3-L1 adipocytes exposed to a high-glucose medium (25 mM) with insulin (100 nM). Data represent means  $\pm$  SE. A  $p$  value  $< 0.05$  represents statistical significance. NaHS, sodium hydrosulfide; IR, insulin receptor; SE, standard error.
