# Supplementary material
Source: PubMed Central journal article supplement (PMC3676664)
Supplement: Supp_Fig4.pdf [file Supp_Fig4.pdf]

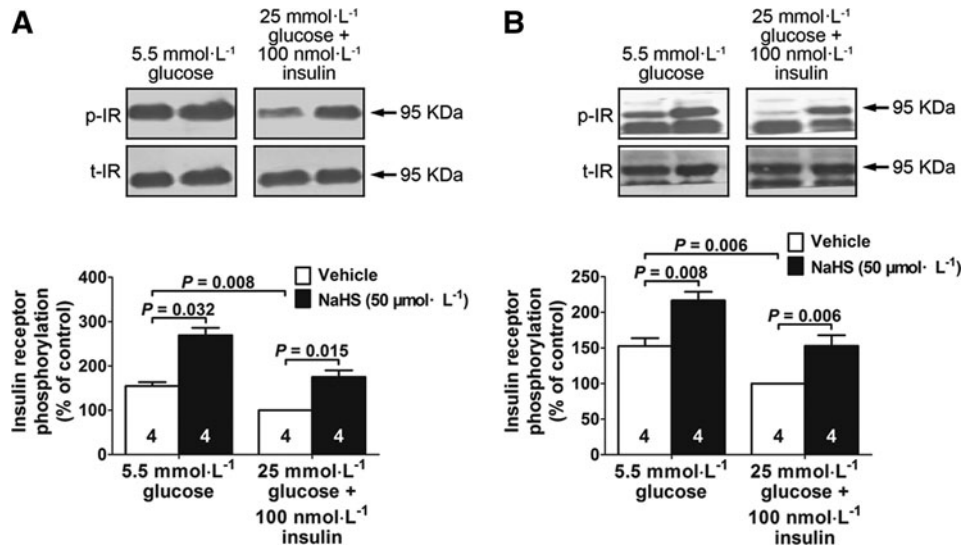

**SUPPLEMENTARY FIG. S4. NaHS stimulates IR phosphorylation in L6 myotubes and 3T3-L1 adipocytes cultured in both low-glucose and high-glucose media.** Cells were treated with NaHS (50  $\mu$ M) for 60 min, followed by stimulation with insulin (100 nM) for 15 min. **(A)** IR phosphorylation in L6 myotubes (these blots are from a same gel in the Western blot analysis). **(B)** IR phosphorylation in 3T3-L1 adipocytes (these blots are from a same gel in the Western blot analysis). Data represent means  $\pm$  SE. A  $p$  value  $<$  0.05 represents statistical significance.
