# Supplementary material
Source: PubMed Central journal article supplement (PMC3676664)
Supplement: Supp_Fig5.pdf [file Supp_Fig5.pdf]

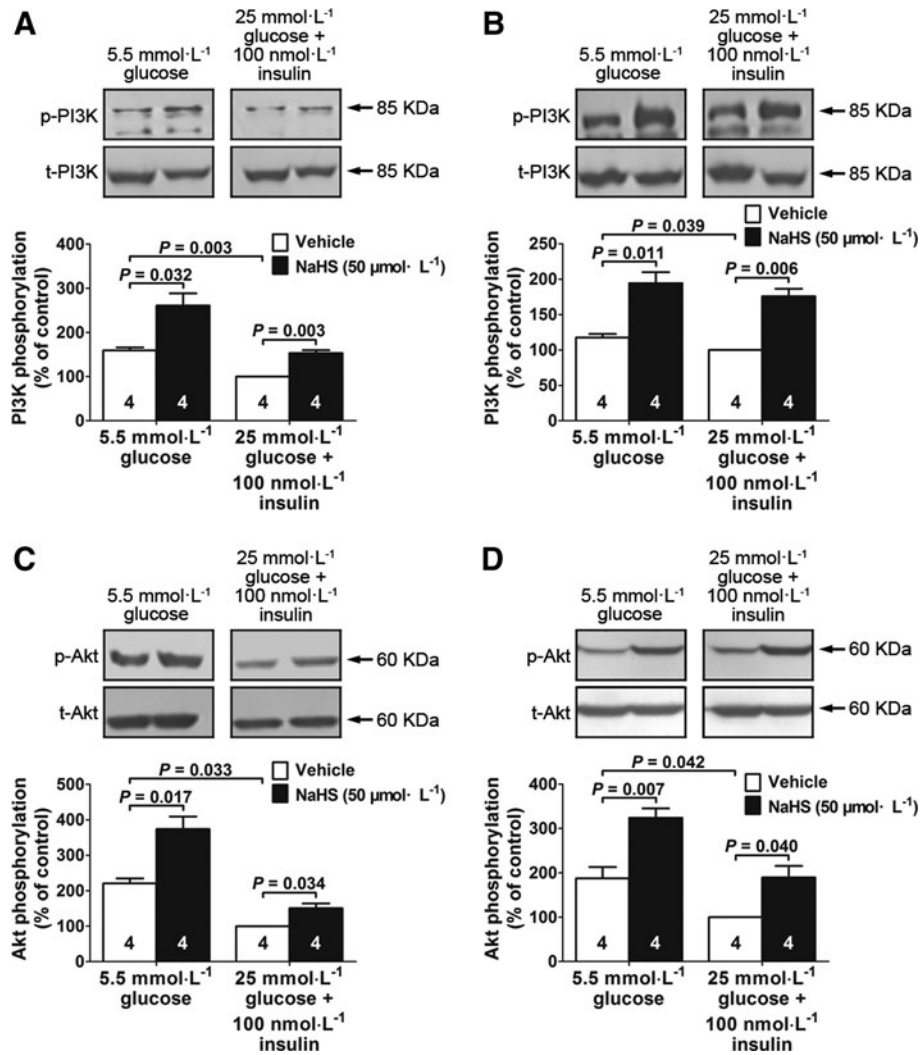

**SUPPLEMENTARY FIG. S5. NaHS stimulated PI3K and Akt phosphorylation in L6 myotubes and 3T3-L1 adipocytes cultured in both low glucose and high glucose media.** Cells were treated with NaHS (50 μM) for 60 min, followed by stimulation with insulin (100 nM) for 15 min. (A) PI3K phosphorylation in L6 myotubes (these blots are from a same gel in the Western blot analysis). (B) PI3K phosphorylation in 3T3-L1 adipocytes (these blots are from a same gel in the Western blot analysis). (C) Akt phosphorylation in L6 myotubes (these blots are from a same gel in the Western blot analysis). (D) Akt phosphorylation in 3T3-L1 adipocytes (these blots are from a same gel in the Western blot analysis). Data represent means ± SE. A *p* value < 0.05 represents statistical significance.
