# Supplementary material
Source: PubMed Central journal article supplement (PMC3676664)
Supplement: Supp_Fig7.pdf [file Supp_Fig7.pdf]

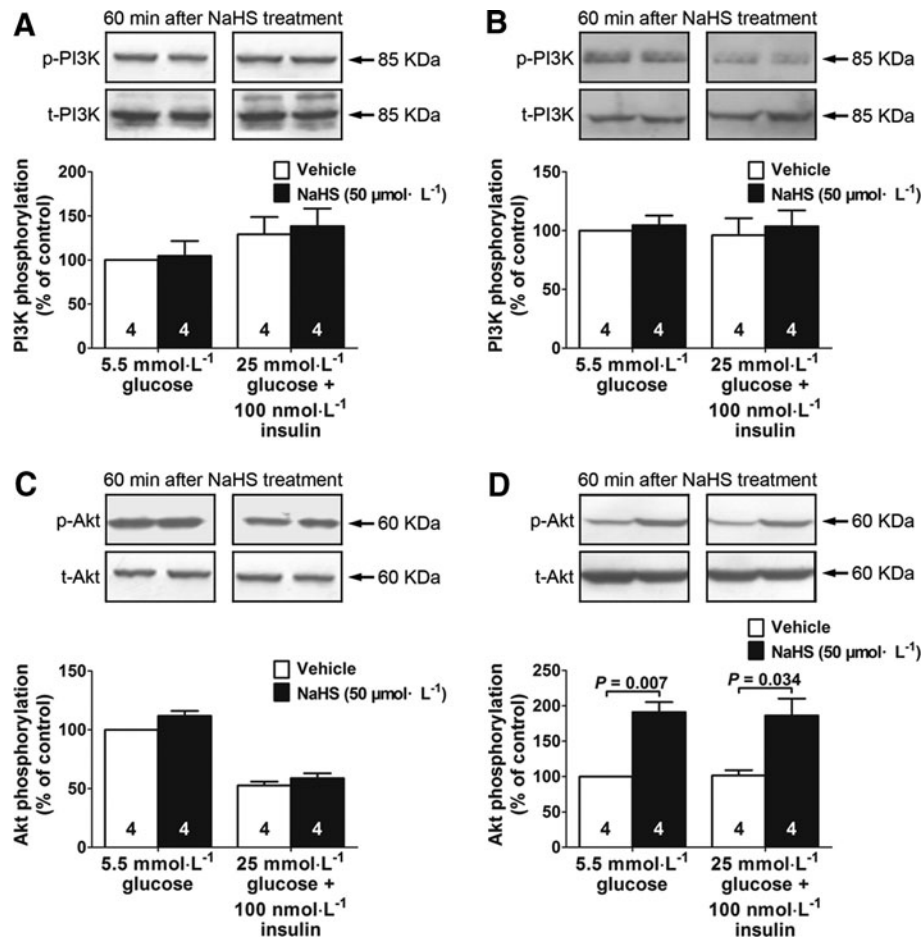

**SUPPLEMENTARY FIG. S7. The effect of the IR inhibitor, HNMPA, on NaHS-induced PI3K and Akt phosphorylation in L6 myotubes and 3T3-L1 adipocytes cultured in both low glucose and high glucose media.** Cells were starved for 24 h and then treated for 30 min with HNMPA (300  $\mu\text{M}$ ) or vehicle, followed by stimulation with NaHS at 50  $\mu\text{M}$  for 60 min and with insulin (100 nM) for 15 min. **(A)** NaHS-induced PI3K phosphorylation in L6 myotubes is prevented by HNMPA (these blots are from a same gel in the Western blot analysis). **(B)** NaHS-induced PI3K phosphorylation in 3T3-L1 adipocytes is prevented by HNMPA (these blots are from a same gel in the Western blot analysis). **(C)** NaHS-induced Akt phosphorylation in L6 myotubes is prevented by HNMPA (these blots are from a same gel in the Western blot analysis). **(D)** NaHS-induced Akt phosphorylation in 3T3-L1 adipocytes is not abolished by HNMPA (these blots are from a same gel in the Western blot analysis). Data represent the means  $\pm$  SE of four independent experiments. A  $p$  value  $< 0.05$  represents statistical significance.
