# Supplementary material
Source: PubMed Central journal article supplement (PMC3676664)
Supplement: Supp_Fig8.pdf [file Supp_Fig8.pdf]

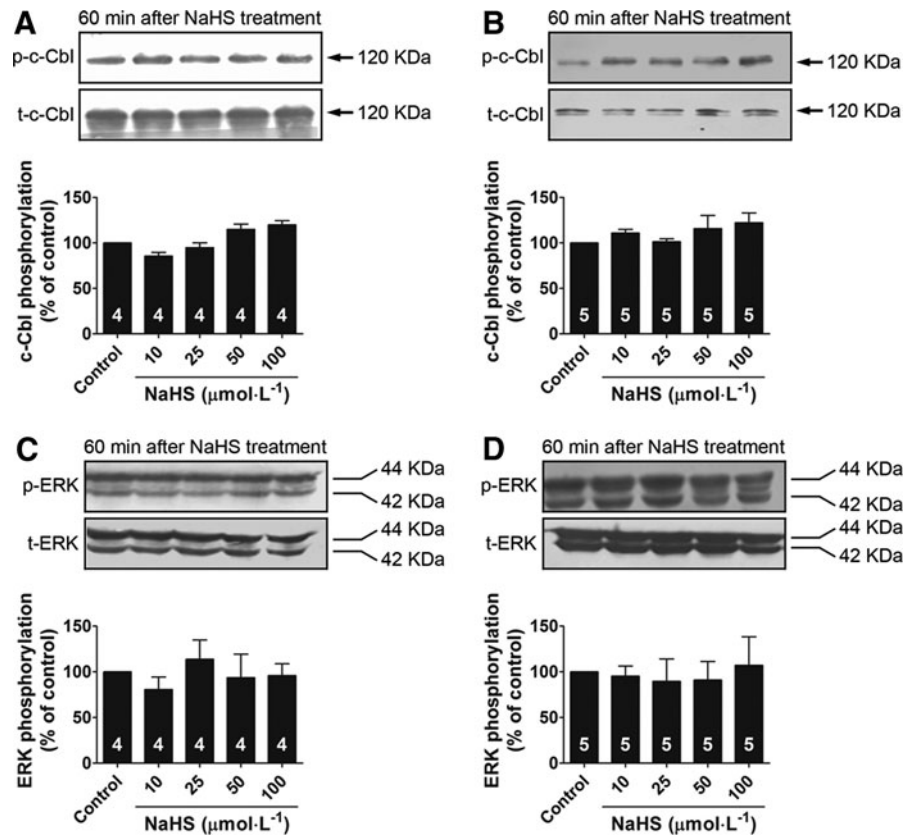

**SUPPLEMENTARY FIG. S8.** NaHS treatment does not induce Cbl and ERK phosphorylation in L6 myotubes and 3T3-L1 adipocytes in the presence of insulin (100 nM). Effects of a 60-min treatment with various concentrations of NaHS (10–100  $\mu\text{M}$ ) on Cbl and ERK phosphorylation. (A, B) Cbl phosphorylation in L6 and 3T3-L1 cells. (C, D) ERK phosphorylation in L6 and 3T3-L1 cells.
