# Supplementary material
Source: PubMed Central journal article supplement (PMC3676664)
Supplement: Supp_Fig9.pdf [file Supp_Fig9.pdf]

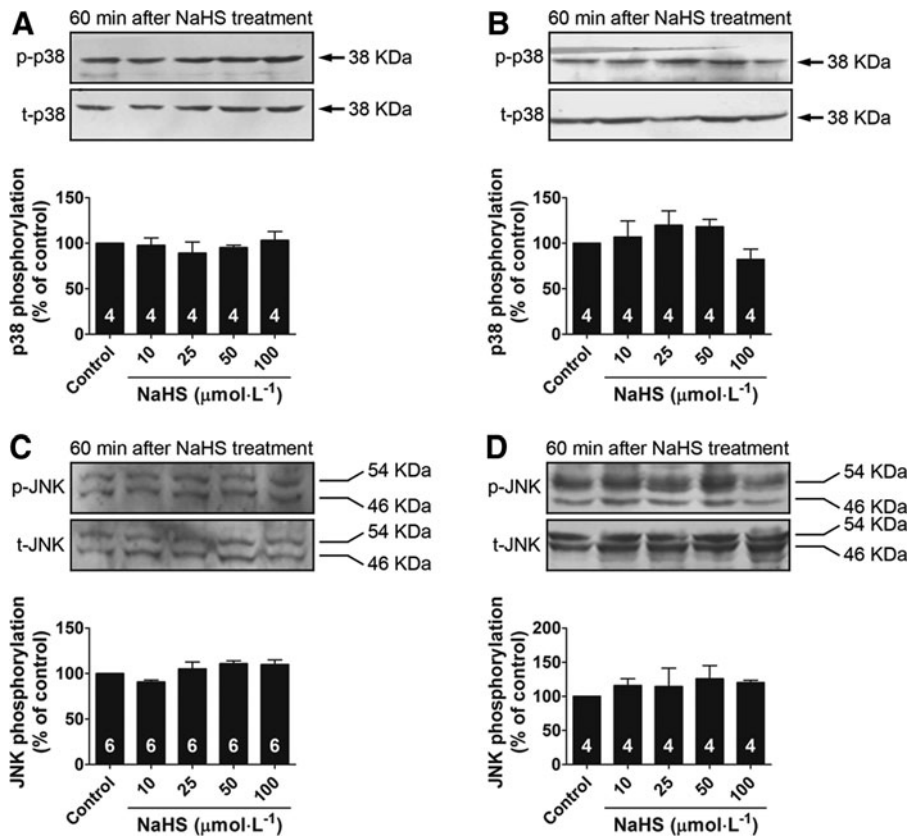

**SUPPLEMENTARY FIG. S9.** Effects of a 60-min treatment with various concentrations of NaHS (10–100  $\mu\text{M}$ ) on p38 and JNK phosphorylation. NaHS treatment does not induce p38 and JNK phosphorylation in L6 myotubes and 3T3-L1 adipocytes in the presence of insulin (100 nM). (A, B) p38 phosphorylation in L6 and 3T3-L1 cells. (C, D) ERK and JNK phosphorylation in L6 and 3T3-L1 cells.
