# Supplementary material
Source: PubMed Central journal article supplement (PMC3676664)
Supplement: Supp_Fig10.pdf [file Supp_Fig10.pdf]

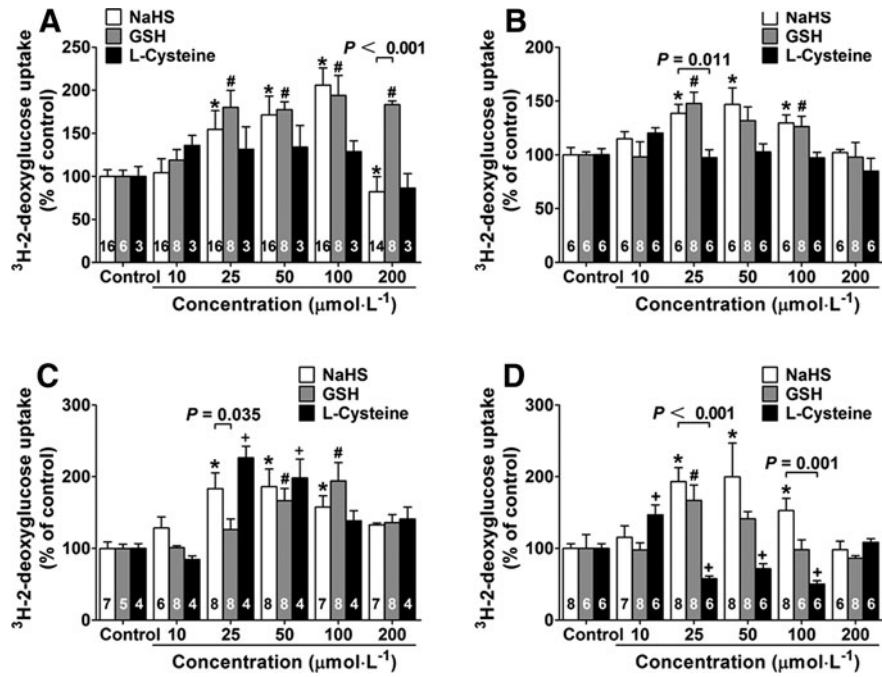

SUPPLEMENTARY FIG. S10. Comparison of the promoting effects of NaHS on glucose uptake with those of the biological thiols GSH and L-cysteine. (A, B) Effects of NaHS, GSH, and L-cysteine on glucose uptake in myotubes (A) and adipocytes (B) cultured in a low-glucose (5.5 mM) medium. Effects of NaHS, GSH, and L-cysteine on glucose uptake in myotubes (C) and adipocytes (D) cultured in a high-glucose medium (25 mM) with insulin (100 nM). \* $p < 0.05$  vs. NaHS control; # $p < 0.05$  vs. GSH control; + $p < 0.05$  vs. L-cysteine control; GSH, glutathione.
