# Supplementary material
Source: PubMed Central journal article supplement (PMC3676664)
Supplement: Supp_Fig11.pdf [file Supp_Fig11.pdf]

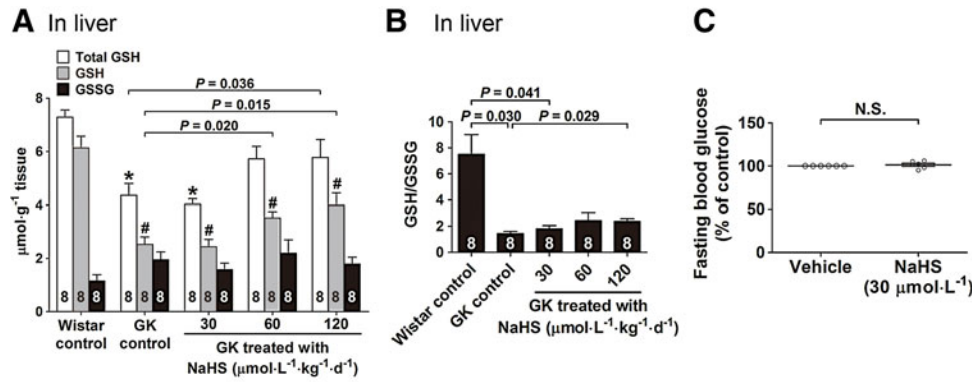

**SUPPLEMENTARY FIG. S11. Effects of chronic NaHS treatment on GSH levels and the ratio of GSH to GSSG in GK rats.** (A) Graphs showing T-GSH, GSH, and GSSG levels in the liver of the Wistar rats and GK rats chronically treated with NaHS or vehicle. \* $p < 0.05$  vs. T-GSH levels in the Wistar control group, # $p < 0.05$  vs. GSH levels in the Wistar control group. (B) Graphs showing the GSH-to-GSSG ratio in the liver of Wistar rats and GK rats chronically treated with NaHS or vehicle. (C) Application of NaHS ( $30\ \mu\text{M}$ ) does not affect the values of plasma glucose measurement. Plasma was collected from 5 starved Wistar rats (8 h, overnight), and each sample was divided into two paired samples with the same volume that applied with vehicle or NaHS ( $30\ \mu\text{M}$ ). Data represent means  $\pm$  SE. A  $p$  value  $< 0.05$  represents statistical significance. GK, Goto-Kakizaki; T-GSH, total GSH.
